# Supplementary material for: Crystal field-induced lattice expansion upon reversible oxygen uptake/release in YbMnxFe2−xO4
Source: Royal Society of Chemistry journal article supplement (doi:10.1039/d1ma00822f), 2021-11-18
Supplement: d1ma00822f1.pdf [file d1ma00822f1.pdf]

## Crystal Field-induced Lattice Expansion upon Reversible Oxygen

### Uptake/Release in $\text{YbMn}_x\text{Fe}_{2-x}\text{O}_4$

Tianyu Li<sup>a</sup>, Rishvi Jayathilake<sup>a</sup>, Lahari Balisetty<sup>a</sup>, Yuan Zhang<sup>a</sup>, Brandon Wilfong<sup>ab</sup>, Timothy Diethrich<sup>a</sup>, Efrain Rodriguez<sup>\*ab</sup>

<sup>a</sup>Department of Chemistry and Biochemistry, University of Maryland, College Park, Maryland 20742-2115, USA

<sup>b</sup>Maryland Quantum Materials Center, University of Maryland, College Park, Maryland 20742, USA

### Electronic Supplementary Information

#### Figures

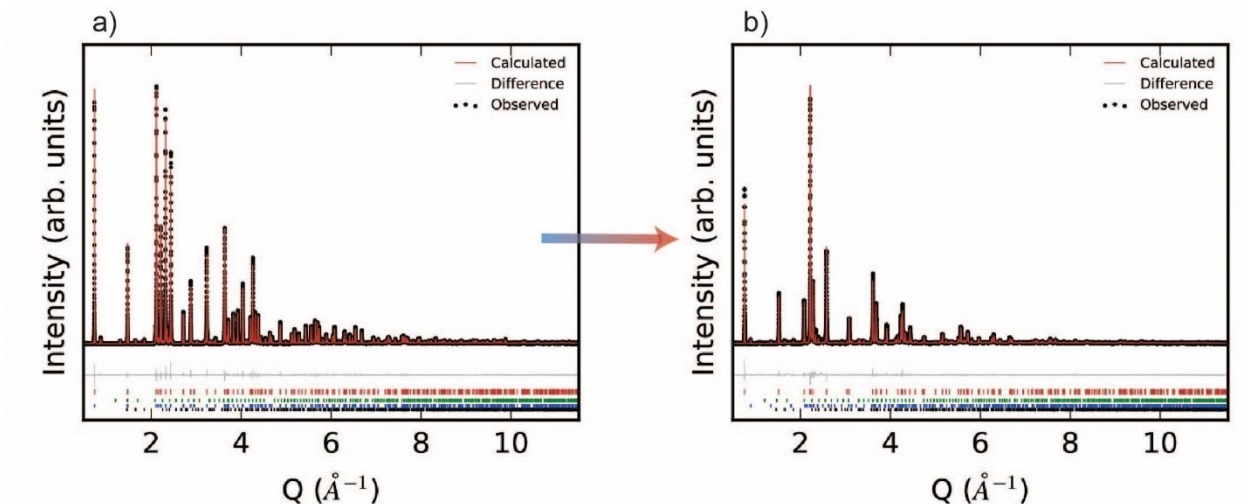

**Figure S1.** High-resolution synchrotron X-ray powder diffraction pattern and the Rietveld refinement fit of R phase  $\text{YbMn}_{0.75}\text{Fe}_{1.25}\text{O}_4$  (a) and the O phase  $\text{YbMn}_{0.75}\text{Fe}_{1.25}\text{O}_{4.5}$  (b). R phase  $\text{YbMn}_{0.75}\text{Fe}_{1.25}\text{O}_4$  is refined with the  $R\bar{3}m$  symmetry and O phase  $\text{YbMn}_{0.75}\text{Fe}_{1.25}\text{O}_{4.5}$  is refined with the  $P\bar{3}$  symmetry. Small amount of  $\text{YbMnO}_3$  and  $\text{Yb}_2\text{Fe}_3\text{O}_7$  exists in the samples (indicated by deep blue and cane tick marks)

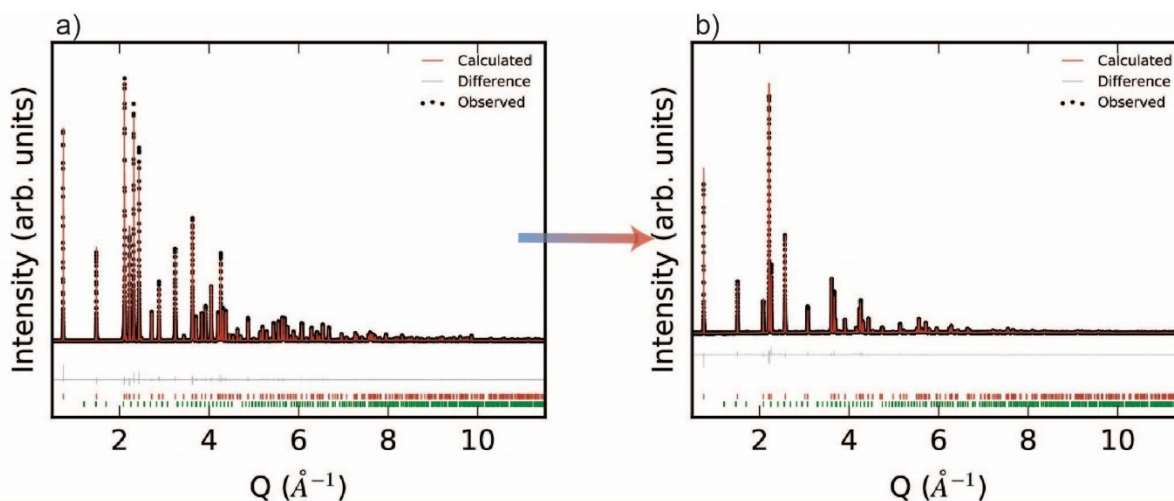

**Figure S2.** High-resolution synchrotron X-ray powder diffraction pattern and the Rietveld refinement fit of R phase YbMn<sub>0.5</sub>Fe<sub>1.5</sub>O<sub>4</sub> (a) and the O phase YbMn<sub>0.5</sub>Fe<sub>1.5</sub>O<sub>4.5</sub> (b). R phase YbMn<sub>0.5</sub>Fe<sub>1.5</sub>O<sub>4</sub> is refined with the  $R\bar{3}m$  symmetry and O phase YbMn<sub>0.5</sub>Fe<sub>1.5</sub>O<sub>4.5</sub> is refined with the  $P\bar{3}$  symmetry. Small amount of Yb<sub>2</sub>O<sub>3</sub> exists in the samples (indicated by green tick marks)

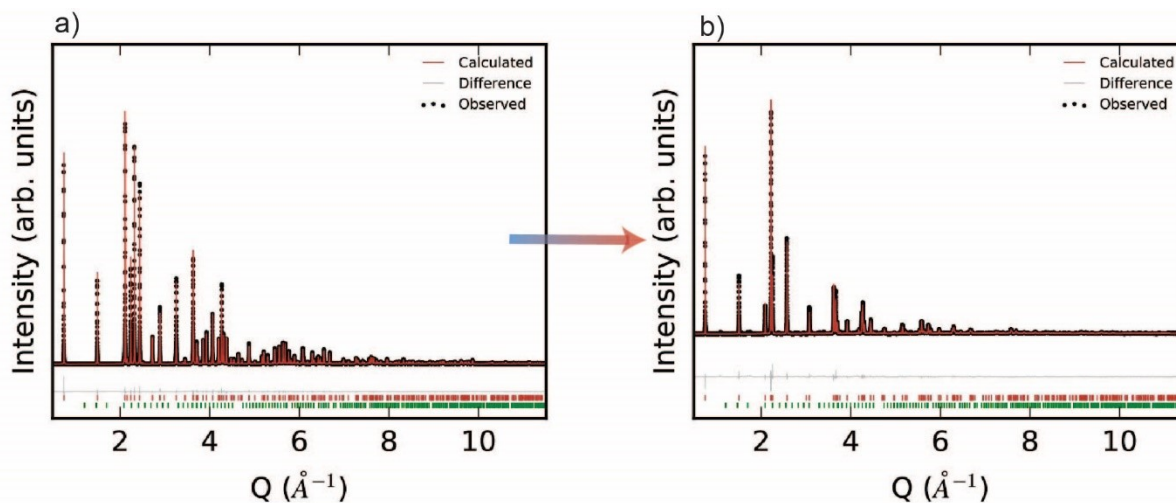

**Figure S3.** High-resolution synchrotron X-ray powder diffraction pattern and the Rietveld refinement fit of R phase YbMn<sub>0.25</sub>Fe<sub>1.75</sub>O<sub>4</sub> (a) and the O phase YbMn<sub>0.25</sub>Fe<sub>1.75</sub>O<sub>4.5</sub> (b). R phase YbMn<sub>0.25</sub>Fe<sub>1.75</sub>O<sub>4</sub> is refined with the  $R\bar{3}m$  symmetry and O phase YbMn<sub>0.25</sub>Fe<sub>1.75</sub>O<sub>4.5</sub> is refined with the  $P\bar{3}$  symmetry. Small amount of Yb<sub>2</sub>O<sub>3</sub> exists in the samples (indicated by green tick marks).

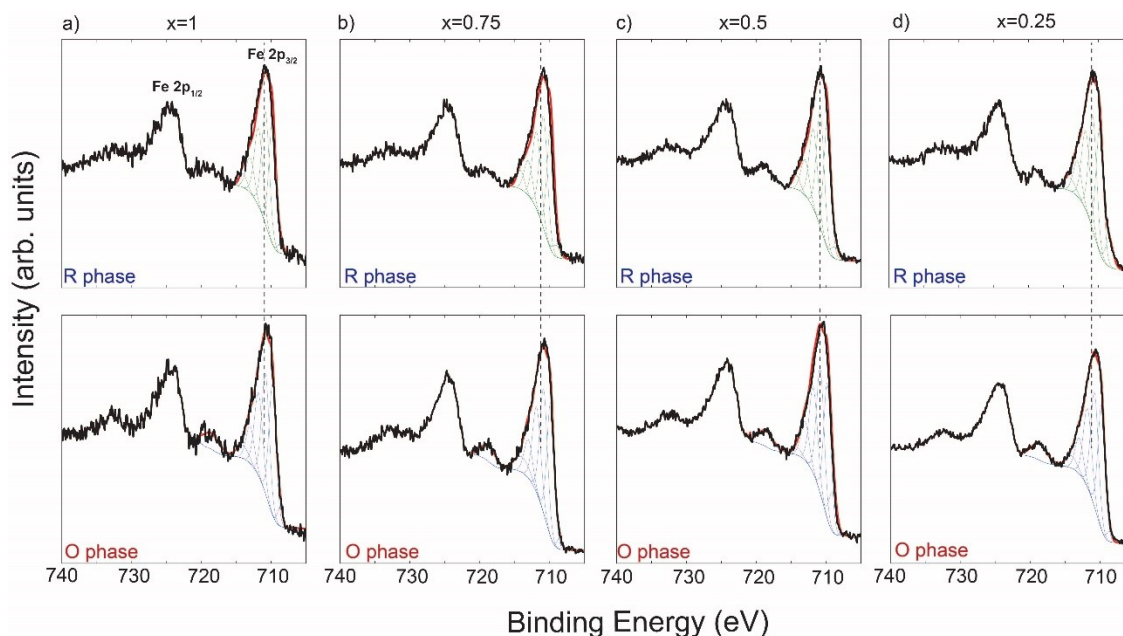

**Figure S4.** Comparison of Fe 2p XPS spectra between of R phase  $\text{YbMn}_x\text{Fe}_{2-x}\text{O}_4$  and the O phase  $\text{YbMn}_x\text{Fe}_{2-x}\text{O}_{4.5}$ : a)  $x=1$ , b)  $x=0.75$ , c)  $x=0.5$ , d)  $x=0.25$ . Upper figures are the spectra from R phase  $\text{YbMn}_x\text{Fe}_{2-x}\text{O}_4$ . Lower figures are the spectra from O phase  $\text{YbMn}_x\text{Fe}_{2-x}\text{O}_{4.5}$ . All Fe  $2p_{3/2}$  spectra can be well fitted with  $\text{Fe}^{3+}$  profile.

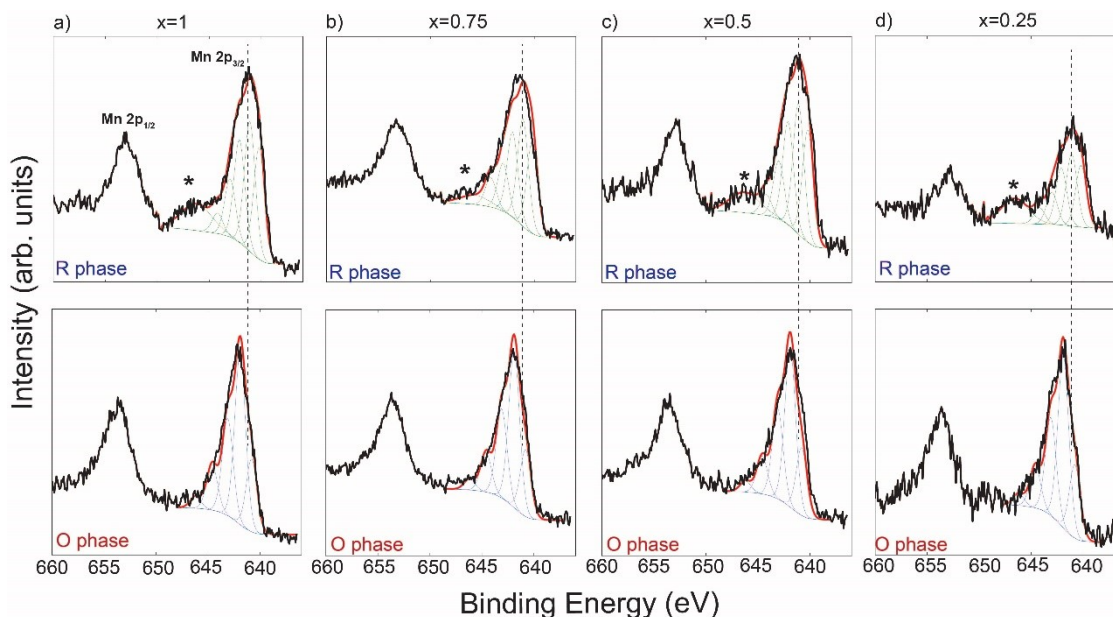

**Figure S5.** Comparison of Mn 2p XPS spectra between of R phase  $\text{YbMn}_x\text{Fe}_{2-x}\text{O}_4$  and the O phase  $\text{YbMn}_x\text{Fe}_{2-x}\text{O}_{4.5}$ : a)  $x=1$ , b)  $x=0.75$ , c)  $x=0.5$ , d)  $x=0.25$ . Upper figures are the spectra from R phase  $\text{YbMn}_x\text{Fe}_{2-x}\text{O}_4$ . Lower figures are the spectra from O phase  $\text{YbMn}_x\text{Fe}_{2-x}\text{O}_{4.5}$ .

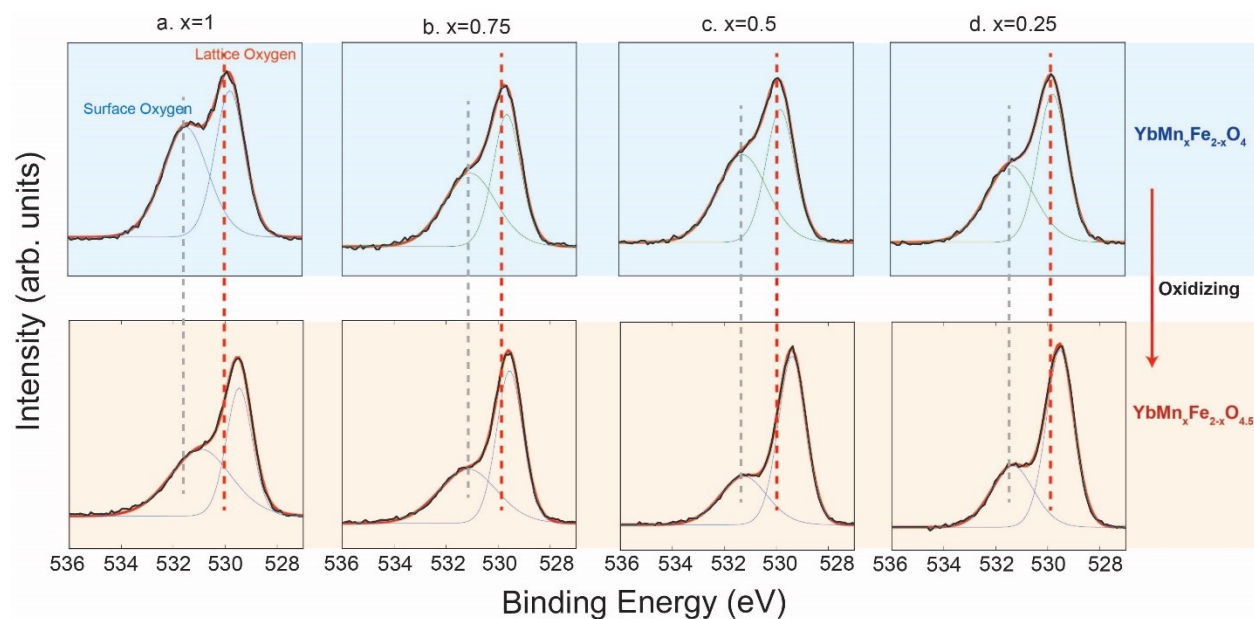

**Figure S6.** Comparison of O1s XPS spectra between of R phase  $\text{YbMn}_x\text{Fe}_{2-x}\text{O}_4$  and the O phase  $\text{YbMn}_x\text{Fe}_{2-x}\text{O}_{4.5}$ : a)  $x=1$ , b)  $x=0.75$ , c)  $x=0.5$ , d)  $x=0.25$ . Upper figures are the spectra from R phase  $\text{YbMn}_x\text{Fe}_{2-x}\text{O}_4$ . Lower figures are the spectra from O phase  $\text{YbMn}_x\text{Fe}_{2-x}\text{O}_{4.5}$ .

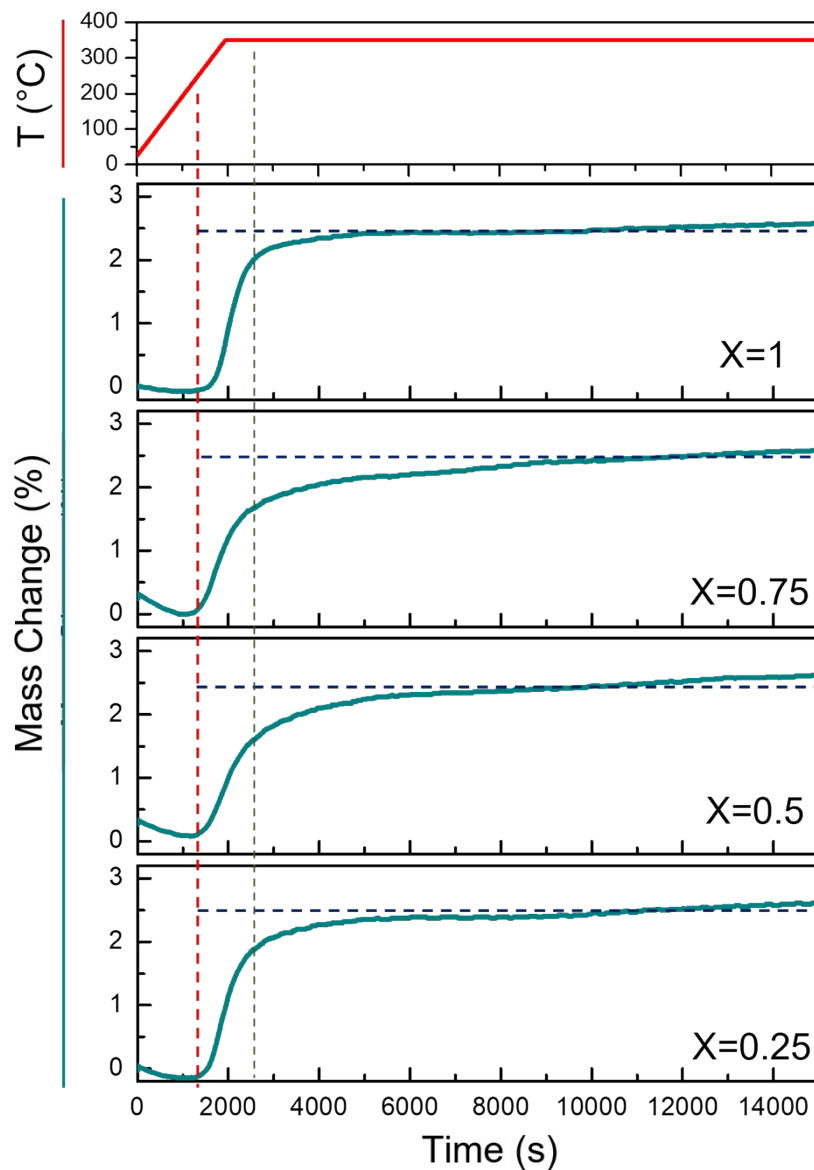

**Figure S7.** Isotherm heating thermogravimetric analysis (TGA) depicting the weight change as a function of time and temperature for R phases  $\text{YbMn}_x\text{Fe}_{2-x}\text{O}_4$  in the air.

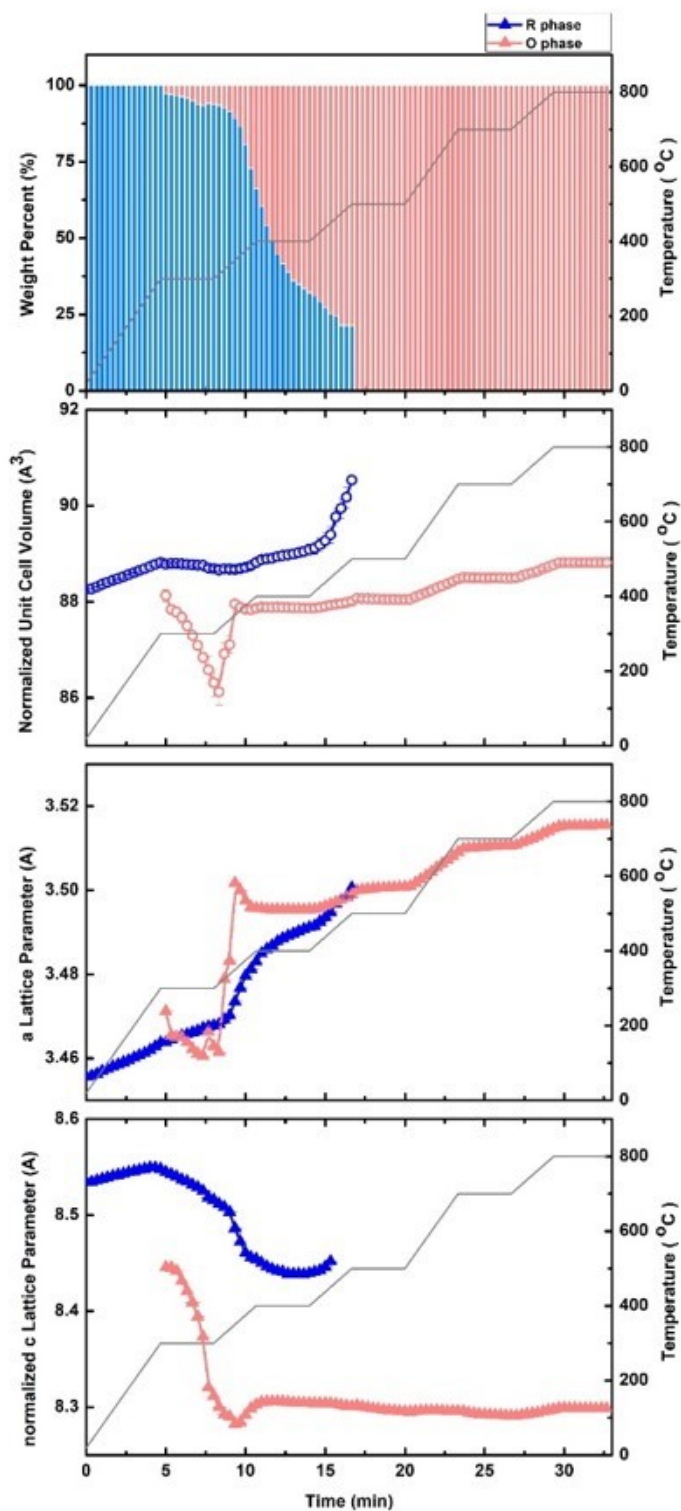

**Figure S8.** Evolution of phase composition and lattice parameter of R phase  $\text{YbMn}_x\text{Fe}_{2-x}\text{O}_4$  ( $x=1$ ) during heating in the air.



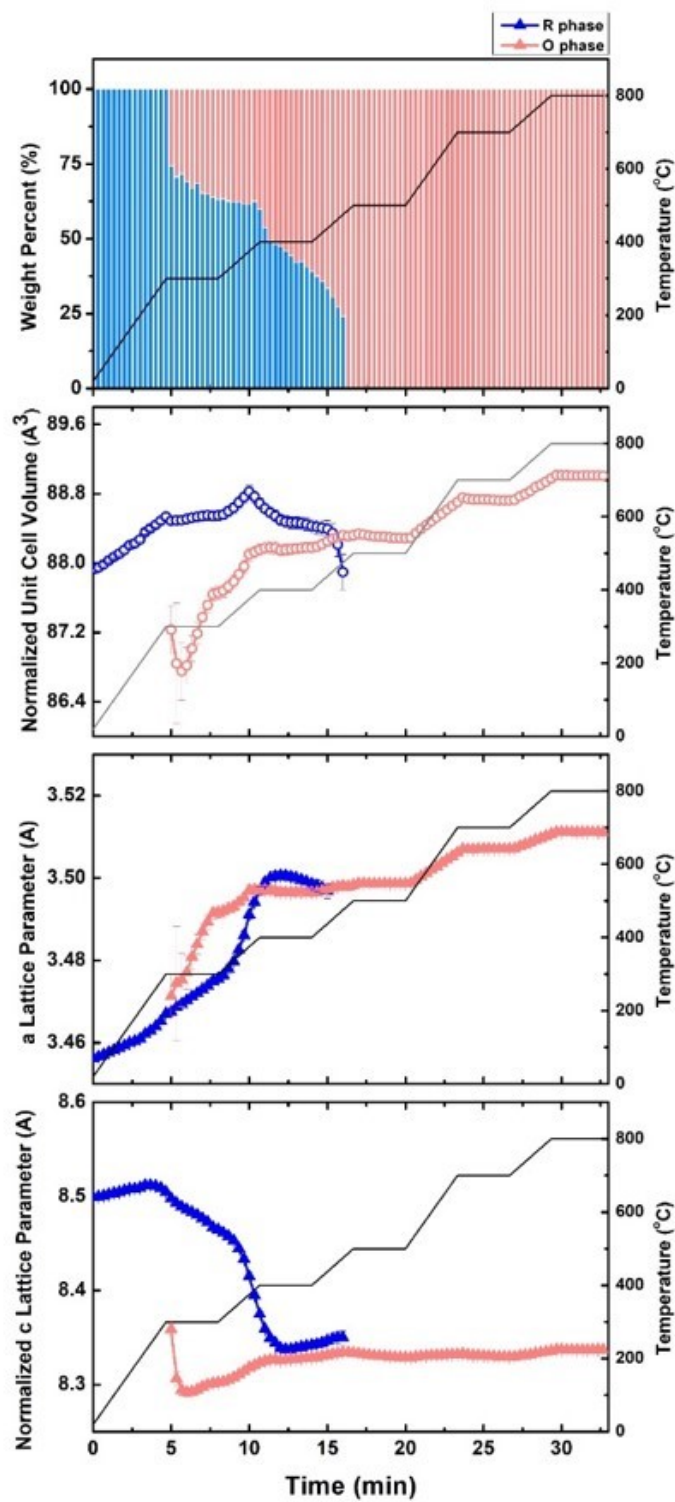

**Figure S9.** Evolution of phase composition and lattice parameter of R phase  $\text{YbMn}_x\text{Fe}_{2-x}\text{O}_4$  ( $x=0.75$ ) during heating in the air.

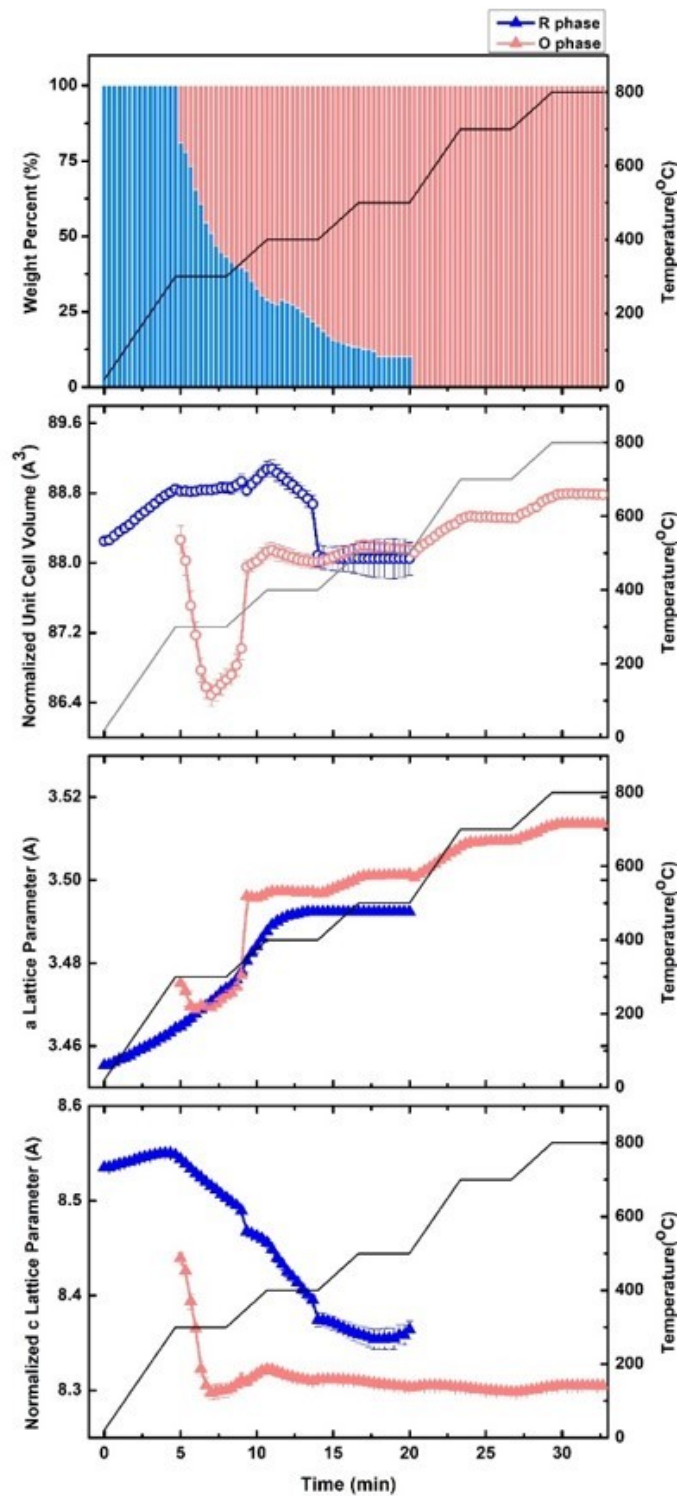

**Figure S10.** Evolution of phase composition and lattice parameter of R phase  $\text{YbMn}_x\text{Fe}_{2-x}\text{O}_4$  ( $x=0.5$ ) during heating in the air.



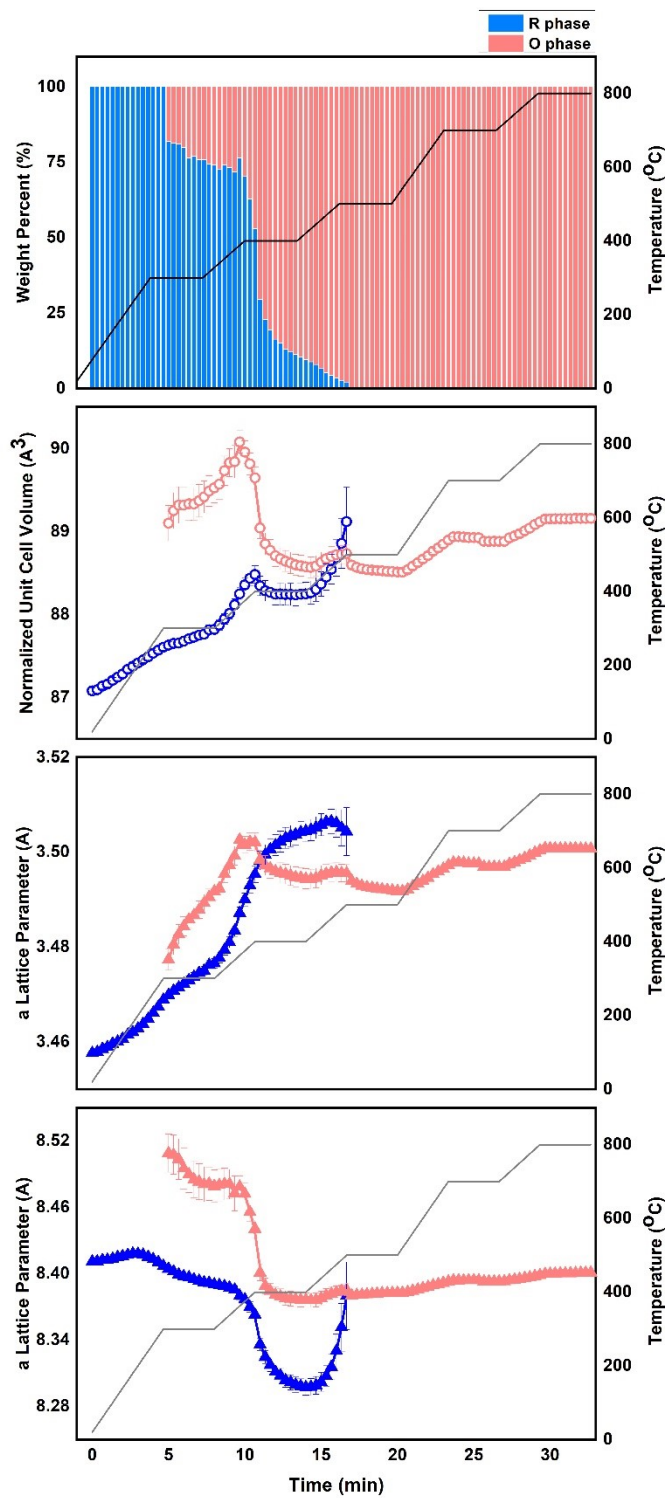

**Figure S11.** Evolution of phase composition and lattice parameter of R phase  $\text{YbMn}_x\text{Fe}_{2-x}\text{O}_4$  ( $x=0.25$ ) during heating in the air.

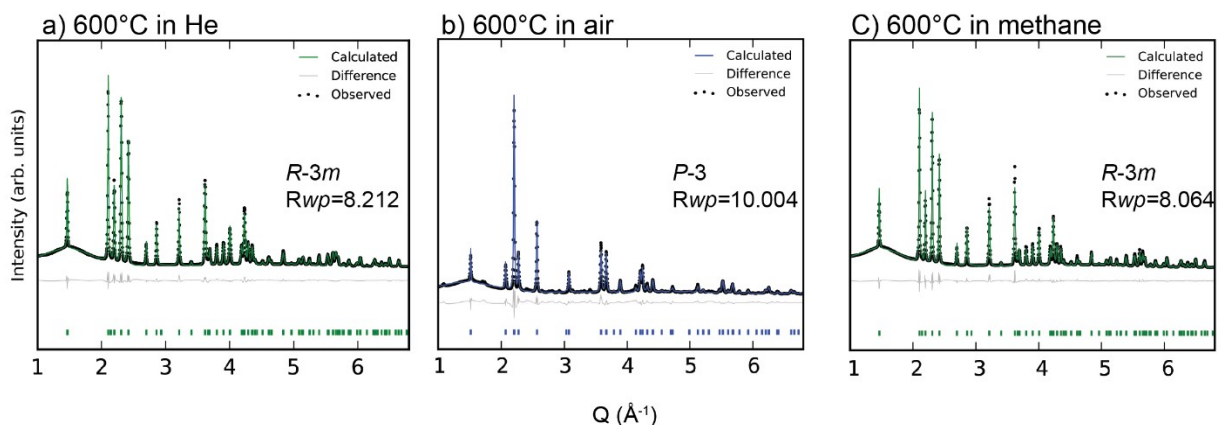

**Figure S12.** Synchrotron X-ray powder diffraction pattern and the Rietveld refinement fit of a)  $\text{YbMnFeO}_4$  in He at  $600^\circ\text{C}$ . b)  $\text{YbMnFeO}_4$  in air at  $600^\circ\text{C}$  and converted to  $\text{YbMnFeO}_{4.5}$ . c) O phase  $\text{YbMnFeO}_{4.5}$  in methane at  $600^\circ\text{C}$  and converted back to R phase  $\text{YbMnFeO}_4$ .

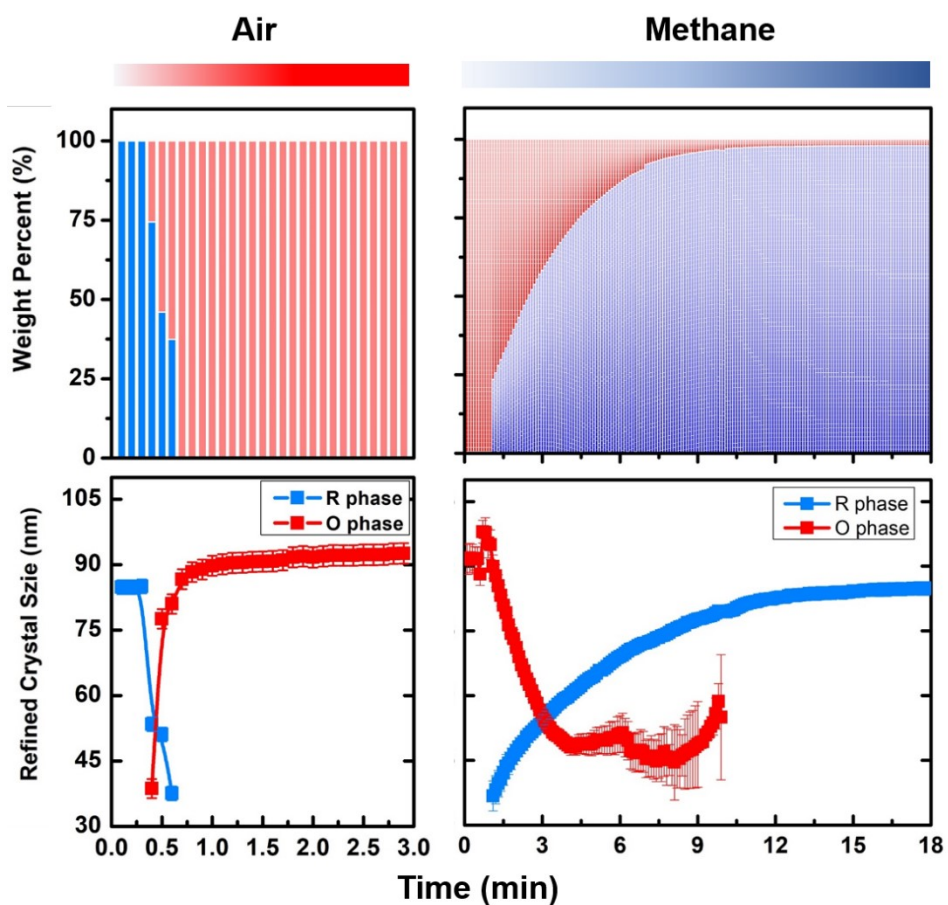

**Figure S13.** Evolution of phase composition (upper figures) and crystal grain size (lower figures) of  $\text{YbMnFeO}_4$  during the cycling of air (oxidation) and methane (reduction).

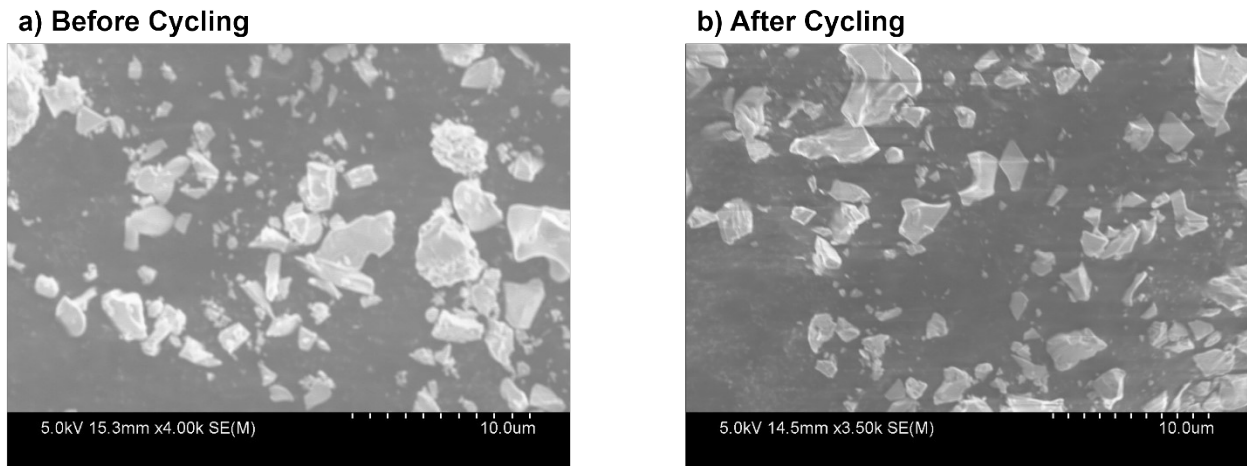

**Figure S14.** SEM image of  $\text{YbMnFeO}_4$  before and after cycling.

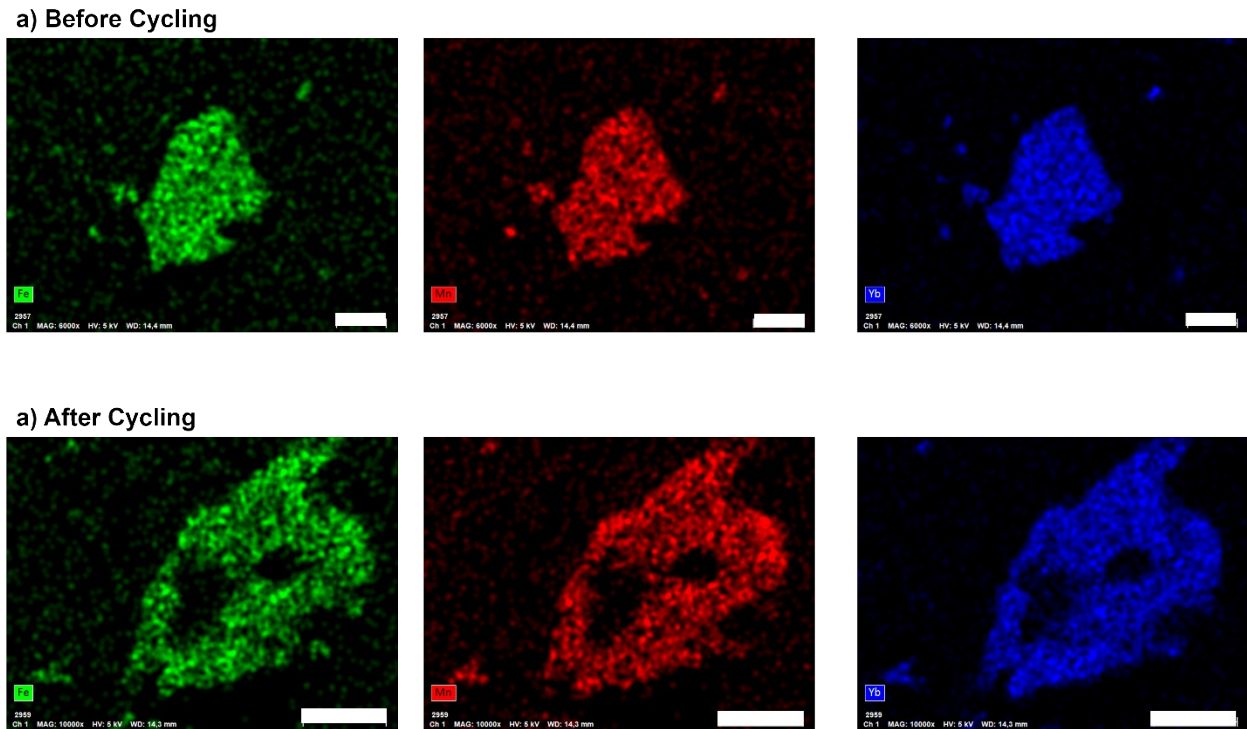

**Figure S15.** SEM-EDS mapping of  $\text{YbMnFeO}_4$  particle (a) before and (b) after cycling. Scale bar is 2 μm.

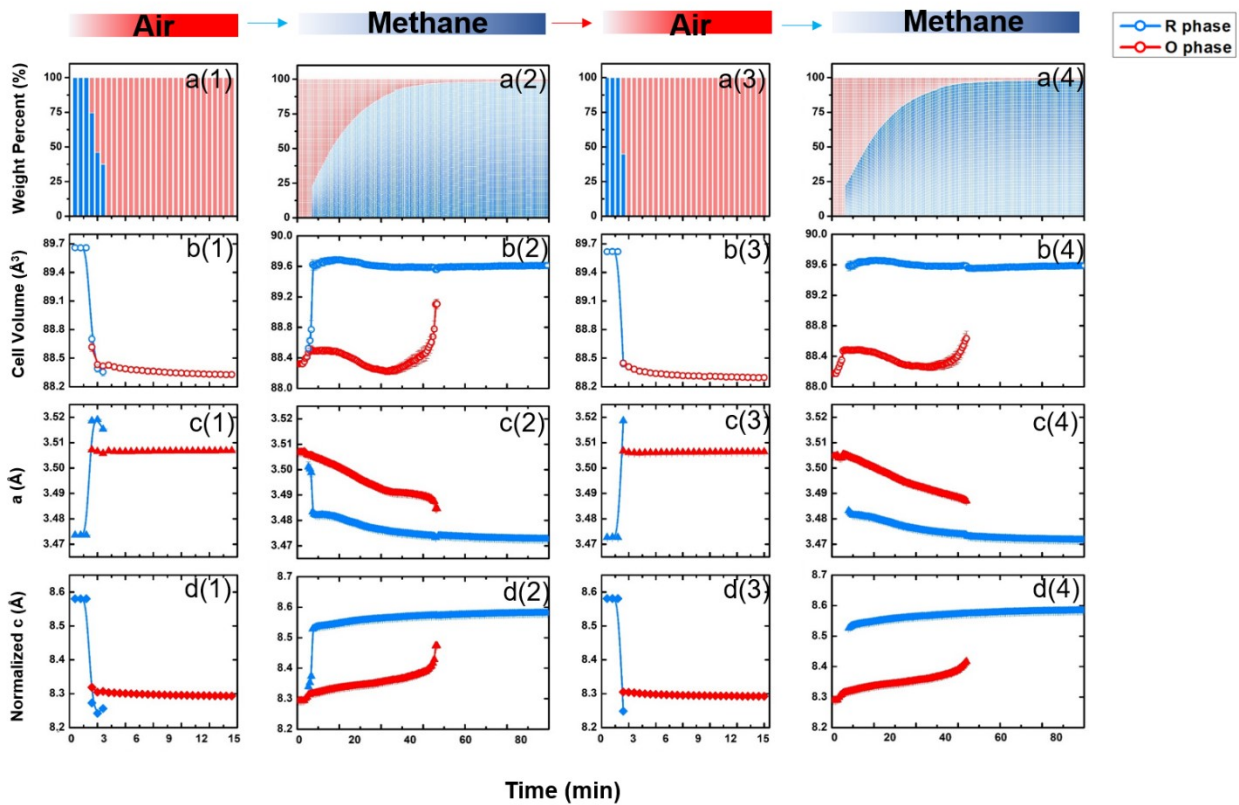

**Figure S16.** The evolution of a) phase composition, b) crystal cell volume, c) a lattice parameter and d) c lattice parameter as function of time during cycling between oxidizing (air) and reducing (methane) atmospheres at 600 °C for  $\text{YbMn}_{0.75}\text{Fe}_{1.25}\text{O}_4$  ( $\chi=1$ ).

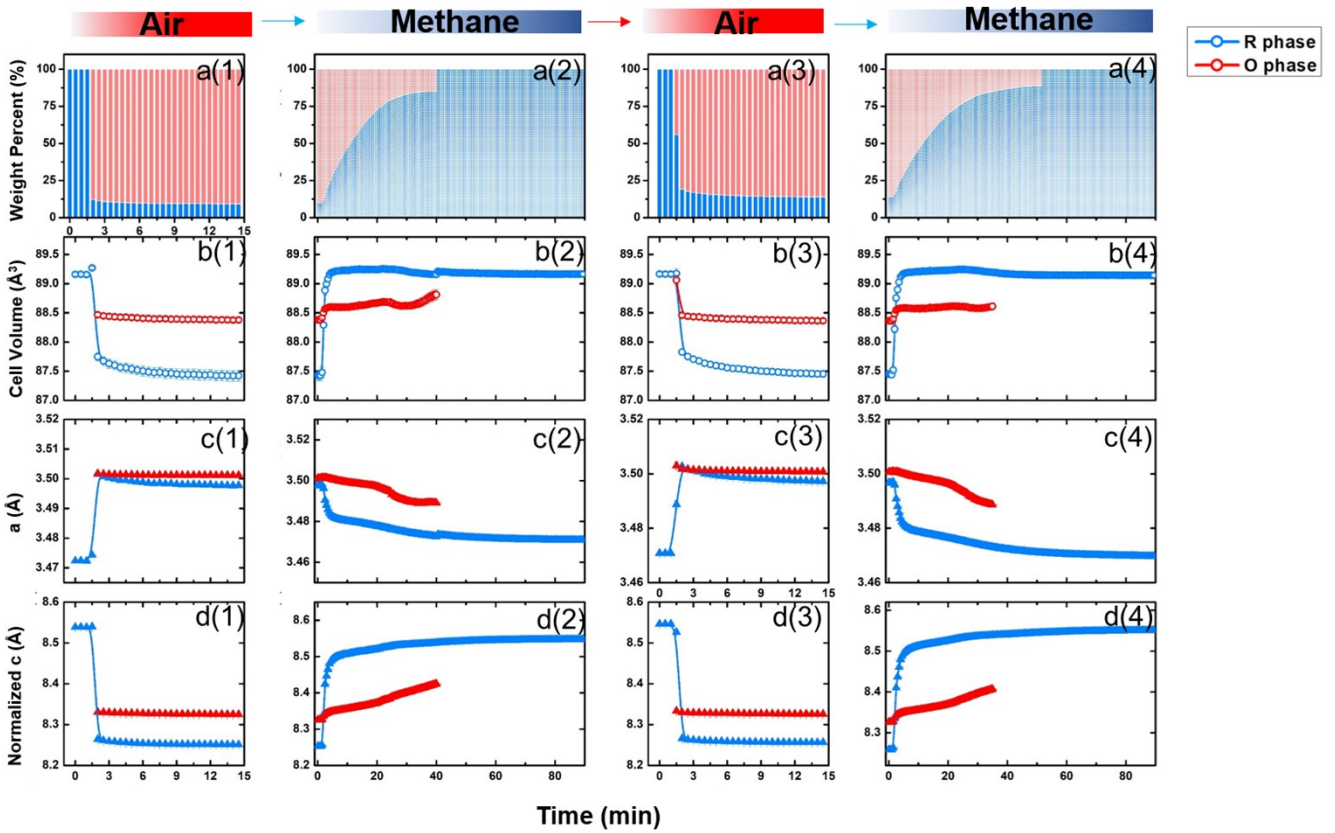

**Figure S17.** The evolution of a) phase composition, b) crystal cell volume, c)  $a$  lattice parameter and d)  $c$  lattice parameter as function of time during cycling between oxidizing (air) and reducing (methane) atmospheres at 600 °C for  $\text{YbMn}_{0.75}\text{Fe}_{1.25}\text{O}_4$  ( $x=0.75$ ).



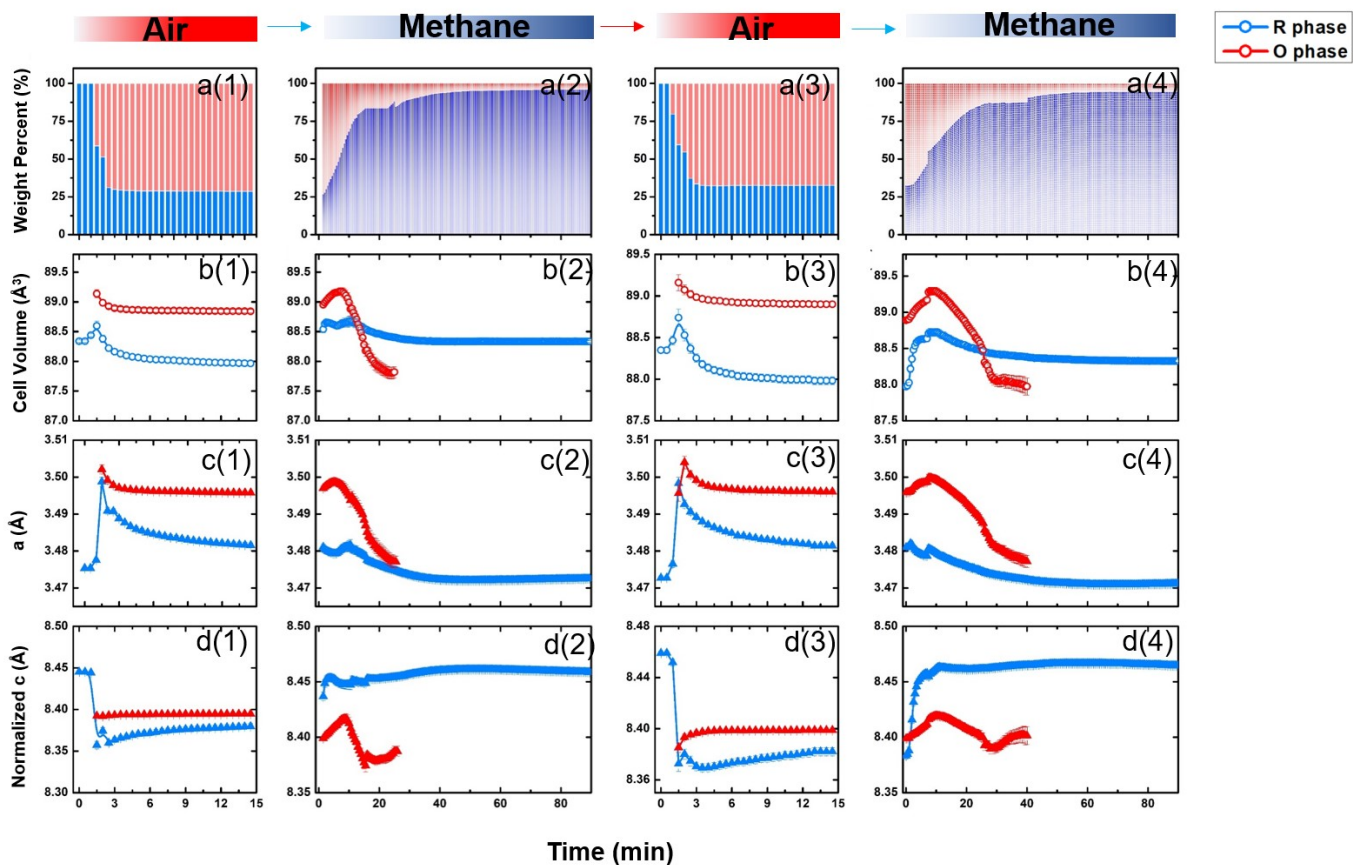

**Figure S18.** The evolution of a) phase composition, b) crystal cell volume, c) a lattice parameter and d) c lattice parameter as function of time during cycling between oxidizing (air) and reducing (methane) atmospheres at 600 °C for  $\text{YbMn}_{0.25}\text{Fe}_{1.75}\text{O}_4$  ( $x=0.25$ )



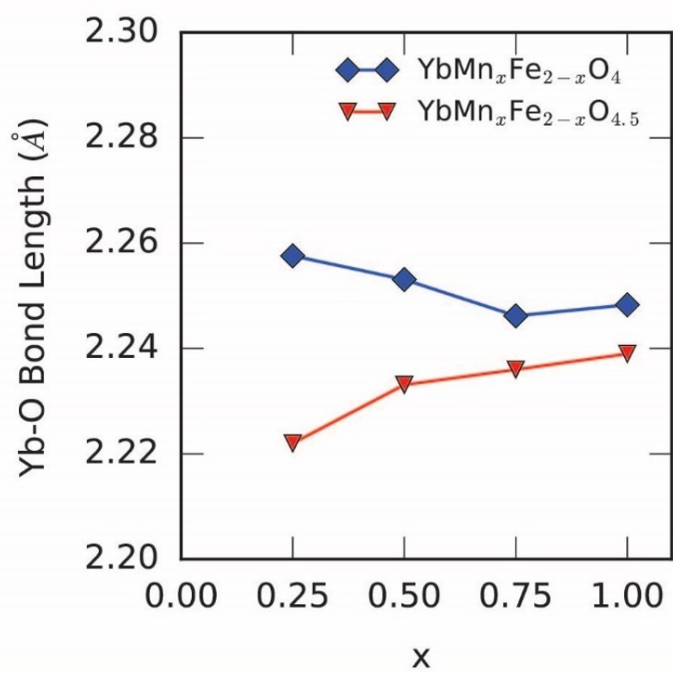

**Figure S19.** Influence of Mn substitution on Yb-O bond length of R phase  $\text{YbMn}_x\text{Fe}_{2-x}\text{O}_4$  (blue) and the O phase  $\text{YbMn}_x\text{Fe}_{2-x}\text{O}_{4.5}$  (red).

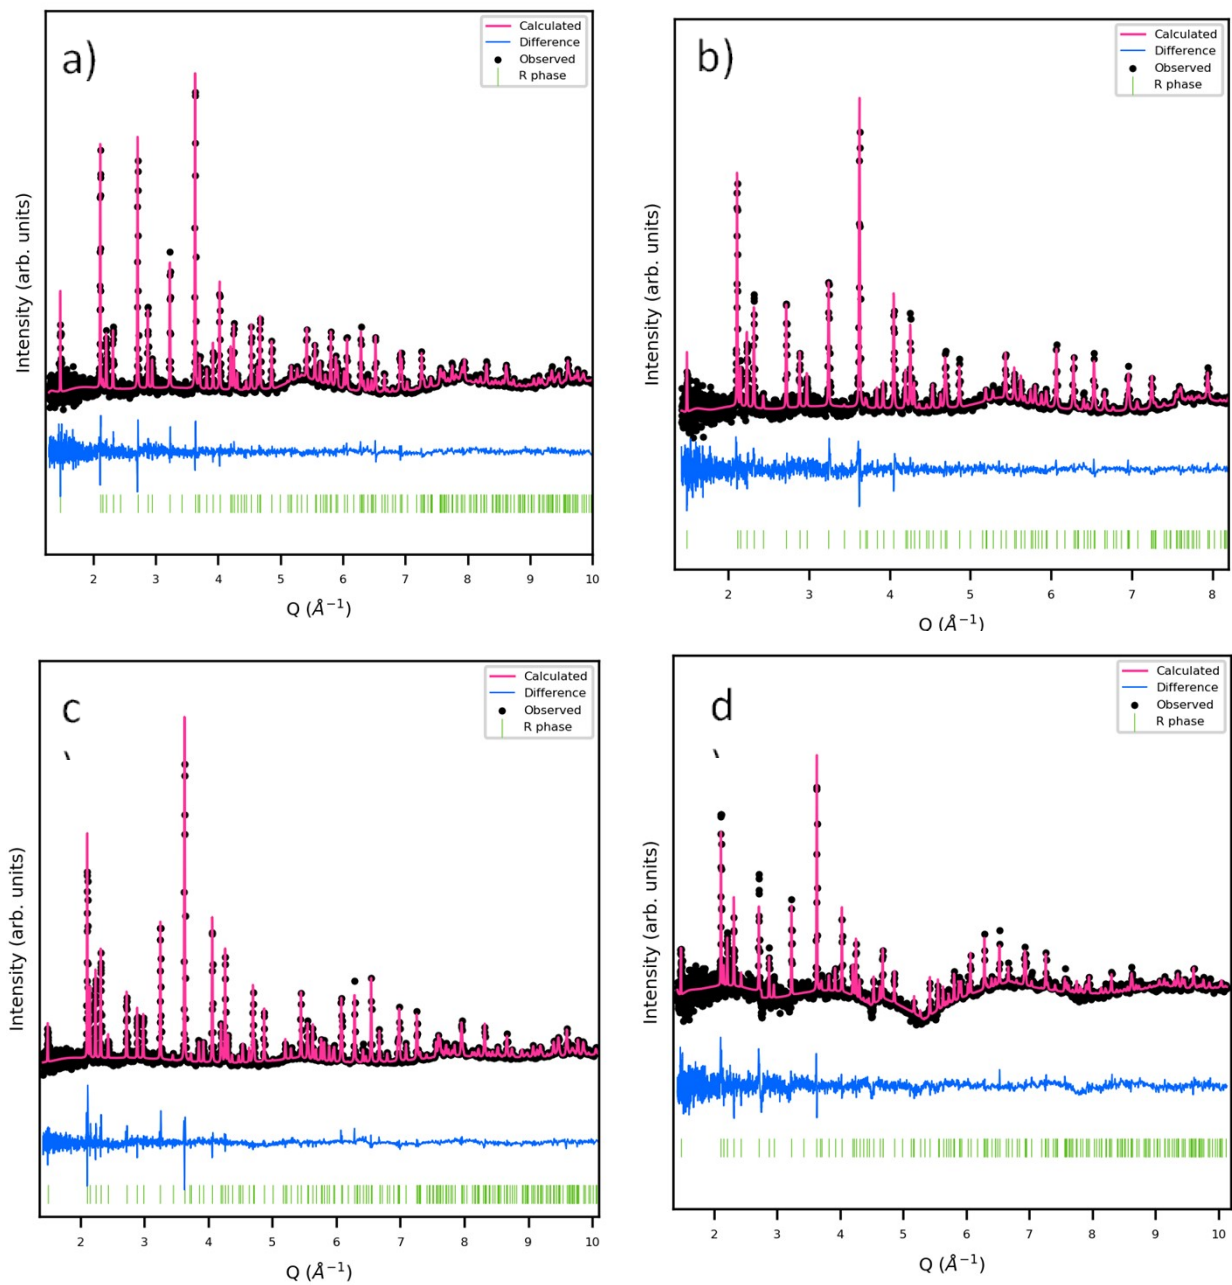

**Figure S20.** Rietveld refinement of powder neutron diffraction of reduced phases with varying amount of Mn doping: a) YbMnFeO<sub>4</sub>, b) YbMn<sub>0.5</sub>Fe<sub>1.5</sub>O<sub>4</sub>, c) YbMn<sub>0.25</sub>Fe<sub>1.75</sub>O<sub>4</sub>, d) YbMn<sub>0.75</sub>Fe<sub>1.25</sub>O<sub>4</sub>. Due to that not enough sample were used in the neutron diffraction measurement, the quality of data is poor.

## Tables

|                                                                                 |             | atom  | occ           | x | y | z          | u11=u22     | u33        |
|---------------------------------------------------------------------------------|-------------|-------|---------------|---|---|------------|-------------|------------|
| <b>YbMnFeO<sub>4</sub>, R-3m</b>                                                |             |       |               |   |   |            |             |            |
| 0.03% Yb <sub>2</sub> O <sub>3</sub>                                            |             | Yb    | 0.968(1)      | 0 | 0 | 0          | 0.00180(7)  | 0.0294(2)  |
| <i>Rwp</i> =10.934%                                                             |             | Fe/Mn | Fe 1/2 Mn 1/2 | 0 | 0 | 0.21578(2) | 0.0059(1)   | 0.0091(3)  |
| <b>a</b>                                                                        | 3.45799(2)  | O1    | 1             | 0 | 0 | 0.12801(7) | beq=1.80(4) |            |
| <b>c</b>                                                                        | 25.6136(1)  | O2    | 0.985(3)      | 0 | 0 | 0.29297(6) | beq=0.62(4) |            |
| <b>YbMn<sub>0.75</sub>Fe<sub>1.25</sub>O<sub>4</sub>, R-3m</b>                  |             |       |               |   |   |            |             |            |
| 2.61% YbMnO <sub>3</sub> , 2.15% Yb <sub>2</sub> Fe <sub>3</sub> O <sub>7</sub> |             | Yb    | 0.962(2)      | 0 | 0 | 0          | 0.0035(7)   | 0.0294(2)  |
| <i>Rwp</i> =8.591%                                                              |             | Fe/Mn | Fe 5/8 Mn 3/8 | 0 | 0 | 0.21577(2) | 0.0982(1)   | 0.0071(2)  |
| <b>a</b>                                                                        | 3.45468(2)  | O1    | 1             | 0 | 0 | 0.1282(1)  | beq=2.27(6) |            |
| <b>c</b>                                                                        | 25.5295(2)  | O2    | 0.967(5)      | 0 | 0 | 0.29253(9) | beq=0.86(7) |            |
| <b>YbMn<sub>0.5</sub>Fe<sub>1.5</sub>O<sub>4</sub>, R-3m</b>                    |             |       |               |   |   |            |             |            |
| 0.48% Yb <sub>2</sub> O <sub>3</sub>                                            |             | Yb    | 0.9542(1)     | 0 | 0 | 0          | 0.00275(7)  | 0.03765(2) |
| <i>Rwp</i> =11.032%                                                             |             | Fe/Mn | Fe 3/4 Mn 1/4 | 0 | 0 | 0.21551(2) | 0.0109(2)   | 0.0070(3)  |
| <b>a</b>                                                                        | 3.46183(1)  | O1    | 1             | 0 | 0 | 0.12834(8) | beq=2.33(5) |            |
| <b>c</b>                                                                        | 25.4049(1)  | O2    | 0.941(3)      | 0 | 0 | 0.29239(7) | beq=0.80(3) |            |
| <b>YbMn<sub>0.25</sub>Fe<sub>1.75</sub>O<sub>4</sub>, R-3m</b>                  |             |       |               |   |   |            |             |            |
| 0.32% Yb <sub>2</sub> O <sub>3</sub>                                            |             | Yb    | 0.956(1)      | 0 | 0 | 0          | 0.00225(8)  | 0.0389(2)  |
| <i>Rwp</i> =10.259%                                                             |             | Fe/Mn | Fe 7/8 Mn 1/8 | 0 | 0 | 0.21531(1) | 0.0126(2)   | 0.0106(2)  |
| <b>a</b>                                                                        | 3.46100(1)  | O1    | 1             | 0 | 0 | 0.12815(7) | beq=2.31(4) |            |
| <b>c</b>                                                                        | 25.26212(1) | O2    | 0.948(4)      | 0 | 0 | 0.29174(7) | beq=0.72(3) |            |

**Table S1.** Structural parameters from Rietveld refinement for R phases YbMn<sub>x</sub>Fe<sub>2-x</sub>O<sub>4</sub> (x=1, 0.75, 0.5, 0.25).

|                                                                                 |              | atom  | occ           | x       | y       | z          | u11=u22     | u33       | u12        |
|---------------------------------------------------------------------------------|--------------|-------|---------------|---------|---------|------------|-------------|-----------|------------|
| <b>YbMnFeO<sub>4.5</sub>, P-3</b>                                               |              |       |               |         |         |            |             |           |            |
| 0.03% Yb <sub>2</sub> O <sub>3</sub>                                            |              | Yb    | 1             | 0       | 0       | 0          | 0.040(4)    | 0.0905(7) | 0.0050(3)  |
| <i>Rwp</i> =17.752%                                                             |              | Fe/Mn | Fe 1/2 Mn 1/2 | 0.66666 | 0.33333 | 0.3507(2)  | 0.078(3)    | 0.0000(8) | 0.001(1)   |
| <b>a</b>                                                                        | 3.48847(2)   | O1    | 1             | 0.66666 | 0.33333 | 0.1192(5)  | beq=1.6(1)  |           |            |
| <b>c</b>                                                                        | 8.24724(8)   | O2    | 0.385(7)      | 0       | 0       | 0.322(1)   | beq=1.0(2)  |           |            |
|                                                                                 |              | O3    | 0.865(7)      | 0.33333 | 0.66666 | 0.408(1)   | beq=7.4(5)  |           |            |
| <b>YbMn<sub>0.75</sub>Fe<sub>1.25</sub>O<sub>4.5</sub>, P-3</b>                 |              |       |               |         |         |            |             |           |            |
| 2.61% YbMnO <sub>3</sub> , 2.15% Yb <sub>2</sub> Fe <sub>3</sub> O <sub>7</sub> |              | Yb    | 1             | 0       | 0       | 0          | 0           | 0.0927(6) | 0.0008(3)  |
| <i>Rwp</i> =12.971%                                                             |              | Fe/Mn | Fe 5/8 Mn 3/8 | 0.66666 | 0.33333 | 0.33489(2) | 0.076(1)    | 0.0028(7) | 0.001(1)   |
| <b>a</b>                                                                        | 3.47983(2)   | O1    | 1             | 0.66666 | 0.33333 | 0.11050(4) | beq=3.1(1)  |           |            |
| <b>c</b>                                                                        | 8.28485(6)   | O2    | 0.497(7)      | 0       | 0       | 0.3350(6)  | beq=0.2(1)  |           |            |
|                                                                                 |              | O3    | 0.753(7)      | 0.33333 | 0.66666 | 0.401(6)   | beq=0.2(1)  |           |            |
| <b>YbMn<sub>0.5</sub>Fe<sub>1.5</sub>O<sub>4.5</sub>, P-3</b>                   |              |       |               |         |         |            |             |           |            |
| 0.48% Yb <sub>2</sub> O <sub>3</sub>                                            |              | Yb    | 1             | 0       | 0       | 0          | 0.0073(3)   | 0.0854(4) | 0.007(3)   |
| <i>Rwp</i> =12.788%                                                             |              | Fe/Mn | Fe 3/4 Mn 1/4 | 0.66666 | 0.33333 | 0.3495(2)  | 0.064(2)    | 0.0000(8) | 0.004(1)   |
| <b>a</b>                                                                        | 3.4833699(8) | O1    | 1             | 0.66666 | 0.33333 | 0.1167(4)  | beq=1.98(8) |           |            |
| <b>c</b>                                                                        | 8.33177(4)   | O2    | 0.399(5)      | 0       | 0       | 0.3311(8)  | beq=0.7(1)  |           |            |
|                                                                                 |              | O3    | 0.851(5)      | 0.33333 | 0.66666 | 0.3995(7)  | beq=3.7(2)  |           |            |
| <b>YbMn<sub>0.25</sub>Fe<sub>1.75</sub>O<sub>4.5</sub>, P-3</b>                 |              |       |               |         |         |            |             |           |            |
| 0.48% Yb <sub>2</sub> O <sub>3</sub>                                            |              | Yb    | 1             | 0       | 0       | 0          | 0.0021(4)   | 0.0016(3) | 0.0005(3)  |
| <i>Rwp</i> =18.240%                                                             |              | Fe/Mn | Fe 7/8 Mn 1/8 | 0.66666 | 0.33333 | 0.3512(3)  | 0.064(2)    | 0.0000(8) | 0.00161(1) |
| <b>a</b>                                                                        | 3.47099(1)   | O1    | 1             | 0.66666 | 0.33333 | 0.1156(6)  | beq=2.0(1)  |           |            |
| <b>c</b>                                                                        | 8.35970(6)   | O2    | 0.364(7)      | 0       | 0       | 0.330(1)   | beq=1.6(2)  |           |            |
|                                                                                 |              | O3    | 0.886(7)      | 0.33333 | 0.66666 | 0.390(1)   | beq=3.5(3)  |           |            |

**Table S2.** Structural parameters from Rietveld refinement for O phases YbMn<sub>x</sub>Fe<sub>2-x</sub>O<sub>4.5</sub> (x=1, 0.75, 0.5, 0.25).

| Material $\text{YbMn}_x\text{Fe}_{2-x}\text{O}_{4.5}$ | Distance (Å) |
|-------------------------------------------------------|--------------|
| x=1                                                   | 2.062(3)     |
| x= 0.75                                               | 2.089(6)     |
| x= 0.5                                                | 2.095(2)     |
| x=0.25                                                | 2.135(4)     |
| *x=0                                                  | 2.0605       |

**Table S3.** Interatomic distances between O2 and O3 in the structure of O phases  $\text{YbMn}_x\text{Fe}_{2-x}\text{O}_{4.5}$  (x=1, 0.75, 0.5, 0.25,0). \*Data for x=0 are from the previous study on  $\text{YbFe}_2\text{O}_{4.5}$ <sup>1</sup>.

|                                                                                                                                          | atom                      | modulation wave component | coefficien<br>t |         |         |
|------------------------------------------------------------------------------------------------------------------------------------------|---------------------------|---------------------------|-----------------|---------|---------|
|                                                                                                                                          |                           |                           | x               | y       | z       |
| <b>YbMnFeO<sub>4.5</sub></b><br>super space group: P-1(a,b,g)0<br>k=(0.143, 0.2884, 0.0094)<br>Rwp=12.21%                                | Yb                        | Usin (1)                  | -0.0074         | -0.011  | 0.026   |
|                                                                                                                                          | Fe                        | Usin (1)                  | 0.0567          | -0.0507 | -0.0108 |
|                                                                                                                                          |                           | Ucos (1)                  | -0.0147         | 0.0049  | 0.0251  |
|                                                                                                                                          | O1                        | Usin (1)                  | -0.3613         | 0.0374  | -0.0111 |
|                                                                                                                                          |                           | Ucos (1)                  | 0.1205          | 0.0555  | 9       |
|                                                                                                                                          | O2                        | Usin (1)                  | 0.0237          | -0.0432 | 0.0233  |
|                                                                                                                                          |                           | Ucos (1)                  | -0.0122         | -0.0291 | 0.0063  |
|                                                                                                                                          | O3<br>(O <sub>int</sub> ) | Usin (1)                  | -0.0257         | 0.0107  | 0.0461  |
| Ucos (1)                                                                                                                                 |                           | 0.0155                    | -0.0277         | 0.0055  |         |
| <b>YbMn<sub>0.75</sub>Fe<sub>1.25</sub>O<sub>4.5</sub></b><br>super space group: P-1(a,b,g)0<br>k=(0.1403, 0.29, 0.0098)<br>Rwp=10.64%   | Yb                        | Usin (1)                  | -0.0057         | -0.0135 | 0.0127  |
|                                                                                                                                          | Fe                        | Usin (1)                  | 0.0252          | -0.0104 | 0.0117  |
|                                                                                                                                          |                           | Ucos (1)                  | 0.0547          | -0.0051 | 0.0523  |
|                                                                                                                                          | O1                        | Usin (1)                  | 0.0492          | 0.0431  | 0.0181  |
|                                                                                                                                          |                           | Ucos (1)                  | -0.1039         | -0.0612 | -0.0093 |
|                                                                                                                                          | O2                        | Usin (1)                  | -0.1077         | -0.1851 | -0.0143 |
|                                                                                                                                          |                           | Ucos (1)                  | 0.0003          | -0.0316 | 0.0067  |
|                                                                                                                                          | O3<br>(O <sub>int</sub> ) | Usin (1)                  | 0.0552          | 0.0414  | 0.0341  |
| Ucos (1)                                                                                                                                 |                           | 0.0341                    | -0.0277         | -0.0221 |         |
| <b>YbMn<sub>0.5</sub>Fe<sub>1.5</sub>O<sub>4.5</sub></b><br>super space group: P-1(a,b,g)0<br>k=(0.1501, 0.2902, 0.0101)<br>Rwp=10.22%   | Yb                        | Usin (1)                  | -0.0208         | -0.0009 | 0.0126  |
|                                                                                                                                          | Fe                        | Usin (1)                  | -0.0034         | 0.0048  | 0.0091  |
|                                                                                                                                          |                           | Ucos (1)                  | -0.0305         | -0.0135 | 0.0127  |
|                                                                                                                                          | O1                        | Usin (1)                  | -0.1086         | 0.0115  | 0.026   |
|                                                                                                                                          |                           | Ucos (1)                  | -0.2138         | 0.1101  | -0.0121 |
|                                                                                                                                          | O2                        | Usin (1)                  | 0.1921          | -0.4905 | 2       |
|                                                                                                                                          |                           | Ucos (1)                  | -0.0237         | 0.0904  | 0.0824  |
|                                                                                                                                          | O3<br>(O <sub>int</sub> ) | Usin (1)                  | -0.0526         | 0.0372  | -0.0236 |
| Ucos (1)                                                                                                                                 |                           | 0.0561                    | -0.0603         | 0.0326  |         |
| <b>YbMn<sub>0.25</sub>Fe<sub>1.75</sub>O<sub>4.5</sub></b><br>super space group: P-1(a,b,g)0<br>k=(0.1407, 0.2891, 0.0098)<br>Rwp=12.11% | Yb                        | Usin (1)                  | -0.0044         | -0.0069 | 0.0238  |
|                                                                                                                                          | Fe                        | Usin (1)                  | 0.0148          | -0.019  | 0.0061  |
|                                                                                                                                          |                           | Ucos (1)                  | -0.0011         | 0.0027  | -0.0042 |
|                                                                                                                                          | O1                        | Usin (1)                  | 0.0492          | 0.0431  | 0.0181  |
|                                                                                                                                          |                           | Ucos (1)                  | -0.1039         | -0.0631 | -0.0093 |
|                                                                                                                                          | O2                        | Usin (1)                  | -0.1077         | -0.1851 | -0.0143 |
|                                                                                                                                          |                           | Ucos (1)                  | 0.0002          | -0.0316 | 0.0067  |
|                                                                                                                                          | O3<br>(O <sub>int</sub> ) | Usin (1)                  | 0.0552          | 0.0414  | -0.0049 |
| Ucos (1)                                                                                                                                 |                           | 0.0341                    | -0.0221         | 0.001   |         |



**Table S4.** Modulation parameters of atomic position for O phases  $\text{YbMn}_x\text{Fe}_{2-x}\text{O}_{4.5}$  ( $x=1, 0.75, 0.5, 0.25$ ).

| Composition                                    | Theoretical oxygen storage capacity (%) | Measured oxygen storage capacity (%)<br>(Step heating/isotherm heating) | Mass used in measurement (mg) |
|------------------------------------------------|-----------------------------------------|-------------------------------------------------------------------------|-------------------------------|
| $\text{YbMnFeO}_4$                             | 2.300                                   | 2.85/2.46                                                               | 13.27/9.06                    |
| $\text{YbMn}_{0.75}\text{Fe}_{1.25}\text{O}_4$ | 2.299                                   | 2.56/2.52                                                               | 8.93/7.12                     |
| $\text{YbMn}_{0.5}\text{Fe}_{1.5}\text{O}_4$   | 2.297                                   | 2.36/2.63                                                               | 9.21/7.31                     |
| $\text{YbMn}_{0.25}\text{Fe}_{1.75}\text{O}_4$ | 2.296                                   | 2.97/2.55                                                               | 8.63/6.45                     |

**Table S5.** Theoretical and measured oxygen storage capacity of  $\text{YbMn}_x\text{Fe}_{2-x}\text{O}_4$  ( $x=1, 0.75, 0.5, 0.25$ ).

|                                                                                 |            | atom | occ         | x | y | z         | u11=u22       | u33       |
|---------------------------------------------------------------------------------|------------|------|-------------|---|---|-----------|---------------|-----------|
| $\text{YbMnFeO}_4, R-3m$<br>$R_{wp} = 12.466\%$                                 | Yb         |      | 0.93(1)     | 0 | 0 | 0         | 0.0000(7)     | 0.037(1)  |
|                                                                                 | Fe/Mn      |      | 0.5         | 0 | 0 | 0.21(1)   | 0.000(1)      | 0.00(1)   |
| a                                                                               | 3.4584(4)  | O1   | 1           | 0 | 0 | 0.1273(1) | beq = 2.19(6) |           |
| c                                                                               | 25.5924(6) | O2   | 0.92(1)     | 0 | 0 | 0.2932(1) | beq = 0.59(4) |           |
| $\text{YbMn}_{0.75}\text{Fe}_{1.25}\text{O}_4, R-3m$<br>$R_{wp} = 10.9870028\%$ | Yb         |      | 0.98(3)     | 0 | 0 | 0         | 0.000(1)      | 0.017(2)  |
|                                                                                 | Fe/Mn      |      | 0.875/0.125 | 0 | 0 | 0.2148(4) | 0.0312(2)     | 0.1113(8) |
| a                                                                               | 3.45869(7) | O1   | 1           | 0 | 0 | 0.1283(2) | beq = 1.5(1)  |           |
| c                                                                               | 25.554(1)  | O2   | 0.90(2)     | 0 | 0 | 0.2926(3) | beq = 0.3(1)  |           |
| $\text{YbMn}_{0.5}\text{Fe}_{1.5}\text{O}_4, R-3m$<br>$R_{wp} = 16.2119116\%$   | Yb         |      | 0.96(2)     | 0 | 0 | 0         | 0.000(1)      | 0.046(3)  |
|                                                                                 | Fe/Mn      |      | 0.75/0.25   | 0 | 0 | 0.2160(2) | 0.010(1)      | 0.012(3)  |
| a                                                                               | 3.46483(6) | O1   | 1           | 0 | 0 | 0.1276(2) | beq = 2.5(1)  |           |
| c                                                                               | 25.3568(9) | O2   | 0.95(2)     | 0 | 0 | 0.2931(2) | beq = 0.9(1)  |           |
| $\text{YbMn}_{0.25}\text{Fe}_{1.75}\text{O}_4, R-3m$<br>$R_{wp} = 12.466\%$     | Yb         |      | 0.96(1)     | 0 | 0 | 0         | 0.0000(9)     | 0.035(1)  |
|                                                                                 | Fe/Mn      |      | 0.875/0.125 | 0 | 0 | 0.2155(1) | 0.0094(9)     | 0.008(1)  |
| a                                                                               | 3.46065(3) | O1   | 1           | 0 | 0 | 0.1281(1) | beq = 1.68(7) |           |
| c                                                                               | 25.2575(5) | O2   | 0.97(1)     | 0 | 0 | 0.2929(1) | beq = 0.67(7) |           |

**Table S6:** Lattice parameters, atomic coordinates, and displacement parameters of reduced phases at 200 °C from Rietveld fitting of PND data.
